# Supplementary material
Source: PubMed Central journal article supplement (PMC3404513)
Supplement: NIHMS391613-supplement-01.pdf [file NIHMS391613-supplement-01.pdf]

## Supplementary webappendix

This webappendix formed part of the original submission and has been peer reviewed. We post it as supplied by the authors.

Supplement to: Taylor SM, Parobek CM, Fairhurst RM. Haemoglobinopathies and the clinical epidemiology of malaria: a systematic review and meta-analysis. *Lancet Infect Dis* 2012; published online March 23. DOI:10.1016/S1473-3099(12)70055-5.

## Supplementary methods

### Search Strategy

Our search of MEDLINE using PubMed (through September 9, 2011) used the search criteria: malaria [Title/Abstract] AND (thalassemia[Title/Abstract] OR hemoglobin[Title/Abstract] OR haemoglobin [Title/Abstract] OR sickle[Title/Abstract] OR erythrocyte[Title/Abstract] OR red blood cell[Title/Abstract]).

The Embase search (through September 9, 2011) used the search line: (malaria:ab OR malaria:ti) AND (thalassemia:ab OR thalassemia:ti OR hemoglobin:ab OR hemoglobin:ti OR OR haemoglobin:ab OR haemoglobin:ti OR sickle:ab OR sickle:ti OR erythrocyte:ab OR erythrocyte:ti OR (((red AND blood/exp AND cell:ab) OR red) AND blood/exp AND cell:ti) AND [embase]/lim. For both searches, we limited the studies to those published in English and conducted in humans.

### Outcome Assessment

The presence of *Plasmodium* parasites required demonstration by blood smear, rapid diagnostic test, or PCR testing. For inclusion, severe malaria needed to be defined as a positive test for *P. falciparum* parasitaemia combined with clinical criteria consonant with that defined by the WHO.<sup>1</sup> For the assessment of specific severe malaria syndromes, we required the description of standard definitions of severe malarial anaemia and/or cerebral malaria.<sup>1</sup> Uncomplicated malaria required *P. falciparum* parasitemia along with fever or another symptom suggestive of malaria and non-fulfillment of criteria for severe disease. Asymptomatic parasitaemia was defined as the presence of *P. falciparum* parasitaemia in cross-sectional surveys or the presence of *P. falciparum* parasitaemia in an otherwise asymptomatic patient from prospective or case-control studies. Vivax malaria was defined as the presence of *P. vivax* parasitaemia with fever or another symptom suggestive of malaria; non-malaria clinical syndromes were allowed to be defined on a study basis.

### Assessment of Publication Bias

To assess for publication bias in the reporting of case-control studies that investigated haemoglobinopathies and malaria, funnel plots were constructed using metabias in Stata/IC (version 11, Stata Corp, College Station, TX). By Begg's test, the p-value for publication bias was 0.004 for all included studies that compared case patients to healthy controls.

When stratified by haemoglobinopathy, nonsignificant tests for bias were obtained for each hemoglobinopathy: HbAS (p = 0.697), HbCC (p = 0.174), HbAC (p = 0.652), homozygous  $\alpha$ -thalassaemia (p = 0.358) and heterozygous  $\alpha$ -thalassaemia (p = 0.573). When stratified by case syndrome, there was evidence of significant bias for studies of severe malaria (p = 0.009), but not for those of uncomplicated malaria (p = 1.00), cerebral malaria (p = 0.317), or severe malarial anaemia (p = 0.176) (Figure S1).

Because the clear differences in the estimates of protection from severe malaria between haemoglobinopathies suggested distinct biological correlates, we stratified the analysis by haemoglobinopathy. When studies of severe malaria were stratified by haemoglobinopathy, there was no evidence of significant publication bias upon testing of any of the individual variants: HbAS (p = 0.624), HbCC (p = 0.117), HbAC (p = 1.00), homozygous  $\alpha$ -thalassaemia (p = 1.00) and heterozygous  $\alpha$ -thalassaemia (p = 0.497). Though each of these stratified Begg's tests ultimately included few studies, taken together they suggest a lack of significant publication bias in the studies identified by our systematic review.

**Figure S1. Funnel plots to assess publication bias in case-control studies of severe malaria (A), cerebral malaria (B), severe malarial anaemia (C), and uncomplicated malaria (D).**

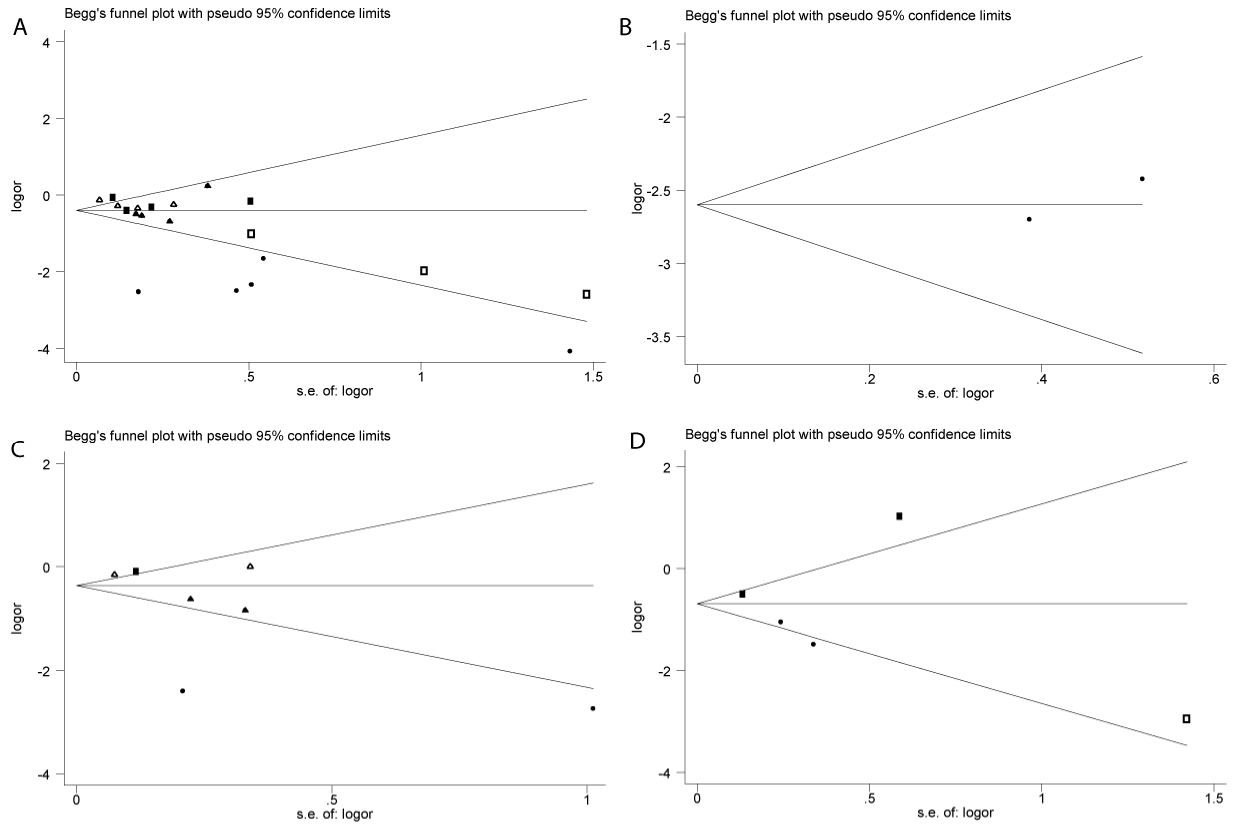

HbAS: filled circles; HbAC: filled squares; HbCC: open squares; homozygous  $\alpha$ -thalassaemia: filled triangles; heterozygous  $\alpha$ -thalassaemia: open triangles. To standardize methods, studies were included in bias assessment if they compared cases to healthy controls.

**Table S1. PRISMA 2009 Checklist**

| Section/ topic                     | #  | Checklist item                                                                                                                                                                                                                                                                                              | Reported on page #       |
|------------------------------------|----|-------------------------------------------------------------------------------------------------------------------------------------------------------------------------------------------------------------------------------------------------------------------------------------------------------------|--------------------------|
| <b>Title</b>                       |    |                                                                                                                                                                                                                                                                                                             |                          |
| Title                              | 1  | Identify the report as a systematic review, meta-analysis, or both.                                                                                                                                                                                                                                         | 1                        |
| <b>Abstract</b>                    |    |                                                                                                                                                                                                                                                                                                             |                          |
| Structured summary                 | 2  | Provide a structured summary including, as applicable: background; objectives; data sources; study eligibility criteria, participants, and interventions; study appraisal and synthesis methods; results; limitations; conclusions and implications of key findings; systematic review registration number. | 2                        |
| <b>Introduction</b>                |    |                                                                                                                                                                                                                                                                                                             |                          |
| Rationale                          | 3  | Describe the rationale for the review in the context of what is already known.                                                                                                                                                                                                                              | 4                        |
| Objectives                         | 4  | Provide an explicit statement of questions being addressed with reference to participants, interventions, comparisons, outcomes, and study design (PICOS).                                                                                                                                                  | 4                        |
| <b>Methods</b>                     |    |                                                                                                                                                                                                                                                                                                             |                          |
| Protocol and registration          | 5  | Indicate if a review protocol exists, if and where it can be accessed (e.g., Web address), and, if available, provide registration information including registration number.                                                                                                                               | 6                        |
| Eligibility criteria               | 6  | Specify study characteristics (e.g., PICOS, length of follow-up) and report characteristics (e.g., years considered, language, publication status) used as criteria for eligibility, giving rationale.                                                                                                      | 6                        |
| Information sources                | 7  | Describe all information sources (e.g., databases with dates of coverage, contact with study authors to identify additional studies) in the search and date last searched.                                                                                                                                  | 6                        |
| Search                             | 8  | Present full electronic search strategy for at least one database, including any limits used, such that it could be repeated.                                                                                                                                                                               | 6                        |
| Study selection                    | 9  | State the process for selecting studies (i.e., screening, eligibility, included in systematic review, and, if applicable, included in the meta-analysis).                                                                                                                                                   | 6                        |
| Data collection process            | 10 | Describe methods used for assessing risk of bias of individual studies (including specification of whether this was done at the study or outcome level), and how this information is to be used in any data synthesis.                                                                                      | 6                        |
| Data items                         | 11 | List and define all variables for which data were sought (e.g., PICOS, funding sources) and any assumptions and simplifications made.                                                                                                                                                                       | 6-7                      |
| Risk of bias in individual studies | 12 | Describe methods used for assessing risk of bias of individual studies (including specification of whether this was done at the study or outcome level), and how this information is to be used in any data synthesis.                                                                                      | 7                        |
| Summary measures                   | 13 | State the principal summary measures (e.g., risk ratio, difference in means).                                                                                                                                                                                                                               | 7-8                      |
| Synthesis of results               | 14 | Describe the methods of handling data and combining results of studies, if done, including measures of consistency (e.g., $I^2$ ) for each meta-analysis.                                                                                                                                                   | 8                        |
| Risk of bias across studies        | 15 | Specify any assessment of risk of bias that may affect the cumulative evidence (e.g., publication bias, selective reporting within studies).                                                                                                                                                                | 8                        |
| Additional analyses                | 16 | Describe methods of additional analyses (e.g., sensitivity or subgroup analyses, meta-regression), if done, indicating which were pre-specified.                                                                                                                                                            | 8                        |
| <b>Results</b>                     |    |                                                                                                                                                                                                                                                                                                             |                          |
| Study selection                    | 17 | Give numbers of studies screened, assessed for eligibility, and included in the review, with reasons for exclusions at each stage, ideally with a flow diagram.                                                                                                                                             | 9                        |
| Study characteristics              | 18 | For each study, present characteristics for which data were extracted (e.g., study size, PICOS, follow-up period) and provide the citations.                                                                                                                                                                | 29-32, 34-35             |
| Risk of bias within studies        | 19 | Present data on risk of bias of each study and, if available, any outcome level assessment (see item 12).                                                                                                                                                                                                   | 29-32, 34-35             |
| Results of individual studies      | 20 | For all outcomes considered (benefits or harms), present, for each study: (a) simple summary data for each intervention group (b) effect estimates and confidence intervals, ideally with a forest plot.                                                                                                    | Fig 1, Fig 2             |
| Synthesis of results               | 21 | Present results of each meta-analysis done, including confidence intervals and measures of consistency.                                                                                                                                                                                                     | Fig 1, Fig 2, Table S2   |
| Risk of bias across studies        | 22 | Present results of any assessment of risk of bias across studies (see Item 15).                                                                                                                                                                                                                             | 9, Supplementary methods |
| Additional analyses                | 23 | Give results of additional analyses, if done (e.g., sensitivity or subgroup analyses, meta-regression [see Item 16]).                                                                                                                                                                                       | 27-34                    |
| <b>Discussion</b>                  |    |                                                                                                                                                                                                                                                                                                             |                          |
| Summary of evidence                | 24 | Summarize the main findings including the strength of evidence for each main outcome; consider their relevance to key groups (e.g., healthcare providers, users, and policy makers).                                                                                                                        | 16-18                    |
| Limitations                        | 25 | Discuss limitations at study and outcome level (e.g., risk of bias), and at review-level (e.g., incomplete retrieval of identified research, reporting bias).                                                                                                                                               | 18                       |
| Conclusions                        | 26 | Provide a general interpretation of the results in the context of other evidence, and implications for future research.                                                                                                                                                                                     | 16-18, Panel 1           |
| <b>Funding</b>                     |    |                                                                                                                                                                                                                                                                                                             |                          |
| Funding                            | 27 | Describe sources of funding for the systematic review and other support (e.g., supply of data); role of funders for the systematic review.                                                                                                                                                                  | 8, Acknowledgements      |

**Table S2. Summary and individual odds ratios from case-control studies estimating protection from malaria syndromes by haemoglobinopathies**

| Source                                | Cases                          | Controls                     | Odds Ratio<br>(95% C. I.)             | I <sup>2</sup><br>(p value) |
|---------------------------------------|--------------------------------|------------------------------|---------------------------------------|-----------------------------|
| <b>Haemoglobin AS</b>                 |                                |                              |                                       |                             |
| Hill et al (1991) <sup>2</sup>        | Severe malaria                 | Severe non-malaria illness   | 0.09 (0.03 – 0.22)                    | NA                          |
| Hill et al (1991) <sup>2</sup>        | Severe malaria                 | Uncomplicated malaria        | 0.39 (0.12 – 1.16)                    | 37.15                       |
| Agarwal et al (2000) <sup>3</sup>     | Severe malaria                 | Uncomplicated malaria        | 1.61 (0.28 – 6.18)                    | 28.87                       |
| Modiano et al (2001) <sup>4</sup>     | Severe malaria                 | Uncomplicated malaria        | 0.28 (0.07 – 0.85)                    | 33.98                       |
| <i>Summary</i> <sup>2-4</sup>         | <i>Severe malaria</i>          | <i>Uncomplicated malaria</i> | <i>0.52 (0.20 – 1.38)</i>             | <i>56.0% (0.103)</i>        |
| Gilles et al (1967) <sup>5</sup>      | Severe malaria                 | Healthy                      | 0.19 (0.07 – 0.55)                    | NA                          |
| Modiano et al (2001) <sup>4</sup>     | Severe malaria                 | Healthy                      | 0.10 (0.04 – 0.26)                    | NA                          |
| Mockenhaupt et al (2004) <sup>6</sup> | Severe malaria                 | Healthy                      | 0.02 (0 – 0.28)                       | NA                          |
| Ackerman et al (2005) <sup>7</sup>    | Severe malaria                 | Healthy                      | 0.08 (0.03 – 0.21)                    | NA                          |
| May et al (2007) <sup>8</sup>         | Severe malaria                 | Healthy                      | 0.08 (0.06 – 0.11)                    | NA                          |
| Jallow et al (2009) <sup>9a</sup>     | Severe malaria                 | Healthy                      | 0.09 (0.05 – 0.16)                    | NA                          |
| <i>Summary</i> <sup>4-8</sup>         | <i>Severe malaria</i>          | <i>Healthy</i>               | <i>0.09 (0.06 – 0.12)</i>             | <i>17.6% (0.303)</i>        |
| Ackerman et al (2005) <sup>7</sup>    | Cerebral malaria               | Healthy                      | 0.09 (0.02 – 0.24)                    | NA                          |
| May et al (2007) <sup>8</sup>         | Cerebral malaria               | Healthy                      | 0.07 (0.03 – 0.14)                    | NA                          |
| Jallow et al (2009) <sup>9a</sup>     | Cerebral malaria               | Healthy                      | 0.12 (0.07 – 0.21)                    | NA                          |
| <i>Summary</i> <sup>7,8</sup>         | <i>Cerebral malaria</i>        | <i>Healthy</i>               | <i>0.07 (0.04 – 0.14)</i>             | <i>0% (0.667)</i>           |
| Ackerman et al (2005) <sup>7</sup>    | Severe malarial anaemia        | Healthy                      | 0.06 (0.002 – 0.38)                   | NA                          |
| May et al (2007) <sup>8</sup>         | Severe malarial anaemia        | Healthy                      | 0.09 (0.06 – 0.14)                    | NA                          |
| Jallow et al (2009) <sup>9a</sup>     | Severe malarial anaemia        | Healthy                      | 0.10 (0.04 – 0.24)                    | NA                          |
| <i>Summary</i> <sup>7,8</sup>         | <i>Severe malarial anaemia</i> | <i>Healthy</i>               | <i>0.09 (0.06 – 0.13)</i>             | <i>0% (0.741)</i>           |
| Willcox et al (1983) <sup>10</sup>    | Uncomplicated malaria          | Healthy                      | 0.23 (0.10 – 0.44)                    | NA                          |
| Modiano et al (2001) <sup>4</sup>     | Uncomplicated malaria          | Healthy                      | 0.35 (0.20 – 0.56)                    | NA                          |
| <i>Summary</i> <sup>4,10</sup>        | <i>Uncomplicated malaria</i>   | <i>Healthy</i>               | <i>0.30 (0.20 – 0.45)</i>             | <i>3.8% (0.308)</i>         |
| Hill et al (1991) <sup>2</sup>        | Uncomplicated malaria          | Mild non-malaria illness     | 0.20 (0.09 – 0.39)                    | NA                          |
| <b>Haemoglobin CC</b>                 |                                |                              |                                       |                             |
| Agarwal et al (2000) <sup>3</sup>     | Severe malaria                 | Uncomplicated malaria        | 0 (0 – 3.34)                          | NA                          |
| Modiano et al (2001) <sup>4</sup>     | Severe malaria                 | Uncomplicated malaria        | NA                                    | NA                          |
| <i>Summary</i> <sup>3,4</sup>         | <i>Severe malaria</i>          | <i>Uncomplicated malaria</i> | <i>1.12</i>                           | <i>9.7% (0.293)</i>         |
|                                       |                                |                              | <i>(0.12 – 10.70)</i>                 |                             |
| Modiano et al (2001) <sup>4</sup>     | Severe malaria                 | Healthy                      | 0.14 (0.02 – 1.01)                    | NA                          |
| Mockenhaupt et al (2004) <sup>6</sup> | Severe malaria                 | Healthy                      | 0.08 (0 – 1.38)                       | NA                          |
| May et al (2007) <sup>8</sup>         | Severe malaria                 | Healthy                      | 0.37 (0.14 – 0.99)                    | NA                          |
| <i>Summary</i> <sup>4,6,8</sup>       | <i>Severe malaria</i>          | <i>Healthy</i>               | <i>0.27 (0.11 – 0.63)</i>             | <i>0% (0.424)</i>           |
| Modiano et al (2001) <sup>4</sup>     | Uncomplicated malaria          | Healthy                      | 0 (0 – 0.41)                          | NA                          |
| <b>Haemoglobin AC</b>                 |                                |                              |                                       |                             |
| Guinet et al (1997) <sup>11</sup>     | Severe malaria                 | Uncomplicated malaria        | 1.11 (0.33 – 4.31)                    | NA                          |
| Agarwal et al (2000) <sup>3</sup>     | Severe malaria                 | Uncomplicated malaria        | 0.25 (0.05 – 0.80)                    | NA                          |
| Modiano et al (2001) <sup>4</sup>     | Severe malaria                 | Uncomplicated malaria        | 1.12 (0.76 – 1.64)                    | NA                          |
| <i>Summary</i> <sup>3,4,11</sup>      | <i>Severe malaria</i>          | <i>Uncomplicated malaria</i> | <i>0.76 (0.32 – 1.79)</i>             | <i>65.7% (0.054)</i>        |
| Gilles et al (1967) <sup>5</sup>      | Severe malaria                 | Healthy                      | 0.85 (0.32 – 2.28)                    | NA                          |
| Modiano et al (2001) <sup>4</sup>     | Severe malaria                 | Healthy                      | 0.66 (0.50 – 0.88)                    | NA                          |
| Mockenhaupt et al (2004) <sup>6</sup> | Severe malaria                 | Healthy                      | 0.73 (0.47 – 1.12)                    | NA                          |
| May et al (2007) <sup>8</sup>         | Severe malaria                 | Healthy                      | 0.92 (0.75 – 1.13)                    | NA                          |
| <i>Summary</i> <sup>4,6,8</sup>       | <i>Severe malaria</i>          | <i>Healthy</i>               | <i>0.83 (0.74 – 0.92)</i>             | <i>17.2% (0.305)</i>        |
| Agarwal et al (2000) <sup>3</sup>     | Cerebral malaria               | Uncomplicated malaria        | 0.15 (0.004 – 0.93) <sup>b</sup>      | NA                          |
| May et al (2007) <sup>8</sup>         | Cerebral malaria               | Healthy                      | 0.64 (0.45 – 0.91)                    | NA                          |
| Guinet et al (1997) <sup>11</sup>     | Severe malarial anaemia        | Uncomplicated malaria        | 0 (0 – 7.37) <sup>b</sup>             | NA                          |
| Agarwal et al (2000) <sup>3</sup>     | Severe malarial anaemia        | Uncomplicated malaria        | 0 (0 – 1.49) <sup>b</sup>             | NA                          |
| <i>Summary</i> <sup>3,11</sup>        | <i>Severe malarial anaemia</i> | <i>Uncomplicated malaria</i> | <i>0.35 (0.04 – 2.73)<sup>b</sup></i> | <i>0% (0.509)</i>           |
| May et al (2007) <sup>8</sup>         | Severe malarial anaemia        | Healthy                      | 0.87 (0.68 – 1.11)                    | NA                          |
| Willcox et al (1983) <sup>10</sup>    | Uncomplicated malaria          | Healthy                      | 2.8 (0.76 – 11.24)                    | NA                          |
| Modiano et al (2001) <sup>4</sup>     | Uncomplicated malaria          | Healthy                      | 0.59 (0.45 – 0.77)                    | NA                          |
| <i>Summary</i> <sup>4,10</sup>        | <i>Uncomplicated malaria</i>   | <i>Healthy</i>               | <i>1.16 (0.26 – 5.23)</i>             | <i>84.9% (0.010)</i>        |
| <b>Haemoglobin AE</b>                 |                                |                              |                                       |                             |
| Oo et al (1995) <sup>12</sup>         | Severe malaria                 | Uncomplicated malaria        | 1.02 (0.59 – 1.80)                    | NA                          |
| Hutagalung et al (1999) <sup>13</sup> | Severe malaria                 | Uncomplicated malaria        | 0.11 (0.003 – 0.70)                   | NA                          |
| <i>Summary</i> <sup>12,13</sup>       | <i>Severe malaria</i>          | <i>Uncomplicated malaria</i> | <i>0.41 (0.04 – 3.95)</i>             | <i>79.5% (0.027)</i>        |
| <b>Homozygous α-thalassaemia</b>      |                                |                              |                                       |                             |
| Lell et al (1999) <sup>14</sup>       | Severe malaria                 | Uncomplicated malaria        | 1.1 (0.4 – 2.9)                       | NA                          |
| Allen et al (1997) <sup>15</sup>      | Severe malaria                 | Healthy                      | 0.50 (0.30 – 0.85)                    | NA                          |

|                                                      |                                |                       |                            |                      |
|------------------------------------------------------|--------------------------------|-----------------------|----------------------------|----------------------|
| Mockenhaupt et al (2004) <sup>16</sup>               | Severe malaria                 | Healthy               | 1.27 (0.60 – 2.68)         | NA                   |
| Williams et al (2005) <sup>17</sup>                  | Severe malaria                 | Healthy               | 0.62 (0.44 – 0.87)         | NA                   |
| May et al (2007) <sup>8</sup>                        | Severe malaria                 | Healthy               | 0.58 (0.40 – 0.85)         | NA                   |
| <i>Summary</i> <sup>8,15-17</sup>                    | <i>Severe malaria</i>          | <i>Healthy</i>        | <i>0.63 (0.48 – 0.83)</i>  | <i>29.6% (0.234)</i> |
| Williams et al (2005) <sup>17</sup>                  | Fatal malaria                  | Healthy               | 0.37 (0.16 – 0.87)         | NA                   |
| Allen et al (1997) <sup>15</sup>                     | Severe malarial anaemia        | Healthy               | 0.34 (0.16 – 0.73)         | NA                   |
| May et al (2007) <sup>8</sup>                        | Severe malarial anaemia        | Healthy               | 0.53 (0.33 – 0.84)         | NA                   |
| <i>Summary</i> <sup>8,15</sup>                       | <i>Severe malarial anaemia</i> | <i>Healthy</i>        | <i>0.50 (0.35 – 0.72)</i>  | <i>0% (0.592)</i>    |
| <b>Heterozygous <math>\alpha</math>-thalassaemia</b> |                                |                       |                            |                      |
| Lell et al (1999) <sup>14</sup>                      | Severe malaria                 | Uncomplicated malaria | 1.3 (0.7 – 2.3)            | NA                   |
| Allen et al (1997) <sup>15</sup>                     | Severe malaria                 | Healthy               | 0.77 (0.44 – 1.34)         | NA                   |
| Mockenhaupt et al (2004) <sup>16</sup>               | Severe malaria                 | Healthy               | 0.67 (0.48 – 0.95)         | NA                   |
| Williams et al (2005) <sup>17</sup>                  | Severe malaria                 | Healthy               | 0.75 (0.59 – 0.96)         | NA                   |
| May et al (2007) <sup>8</sup>                        | Severe malaria                 | Healthy               | 0.88 (0.77 – 1.01)         | NA                   |
| <i>Severe malaria</i> <sup>8,15-17</sup>             | <i>Severe malaria</i>          | <i>Healthy</i>        | <i>0.83 (0.74 – 0.92)</i>  | <i>0% (0.402)</i>    |
| Williams et al (2005) <sup>17</sup>                  | Fatal malaria                  | Healthy               | 0.60 (0.37 – 1)            | NA                   |
| May et al (2007) <sup>8</sup>                        | Cerebral malaria               | Healthy               | 0.80 (0.64 – 1)            | NA                   |
| Allen et al (1997) <sup>15</sup>                     | Severe malarial anaemia        | Healthy               | 0.84 (0.41 – 1.7)          | NA                   |
| May et al (2007) <sup>8</sup>                        | Severe malarial anaemia        | Healthy               | 0.82 (0.69 – 0.96)         | NA                   |
| <i>Summary</i> <sup>8,15</sup>                       | <i>Severe malarial anaemia</i> | <i>Healthy</i>        | <i>0.86 (0.75 – 0.996)</i> | <i>0% (0.651)</i>    |
| <b><math>\beta</math>-thalassaemia</b>               |                                |                       |                            |                      |
| Willcox et al (1983) <sup>10</sup>                   | Uncomplicated malaria          | Healthy               | 0.56 (0.36 – 0.86)         | NA                   |

Abbreviation: NA: not available. Summary ORs were computed using random-effects models using the DerSimonian & Laird method; the  $I^2$  statistic for heterogeneity was calculated using the Mantel-Haenszel method for the subgroups of meta-analyzed data.

<sup>a</sup> Not included in meta-analyses owing to a lack of reported genotype frequencies in cases and controls.

<sup>b</sup> Study reported combined estimate for HbCC and HbAC.

**Table S3. Cross-sectional studies of parasite prevalence and haemoglobinopathies**

| Source                                            | Location                         | Subject selection        | Ages     | Outcome assessed                    | No. wildtype patients | Haemoglobinopathy     | No. patients | Findings                                                                                                             |
|---------------------------------------------------|----------------------------------|--------------------------|----------|-------------------------------------|-----------------------|-----------------------|--------------|----------------------------------------------------------------------------------------------------------------------|
| Allison et al (1954) <sup>18</sup>                | Uganda                           | Community survey         | 5m-5y    | Slide-positive <i>P. falciparum</i> | 247                   | HbAS                  | 43           | <i>P. falciparum</i> less prevalent in HbAS                                                                          |
| Colbourne et al (1956) <sup>19</sup>              | Ghana                            | Community survey         | Children | Slide-positive <i>P. falciparum</i> | 861                   | HbAS                  | 139          | <i>P. falciparum</i> less prevalent in HbAS                                                                          |
| Edington et al (1957) <sup>20</sup>               | Ghana                            | Community survey         | All ages | Slide-positive <i>P. falciparum</i> | 726                   | HbAS                  | 103          | Similar prevalence of <i>P. falciparum</i> in HbAS and HbAA                                                          |
|                                                   |                                  |                          |          |                                     |                       | HbAC/HbCC             | 211          | Similar prevalence of <i>P. falciparum</i> in HbC and HbAA                                                           |
| Thompson et al (1962) <sup>21</sup>               | Ghana                            | Children of Accra police | 1-6y     | Slide-positive <i>P. falciparum</i> | 593                   | HbAS                  | 123          | Similar prevalence of <i>P. falciparum</i> in HbAS and HbAA; lower parasite densities in HbAS                        |
|                                                   |                                  |                          |          |                                     |                       | HbAC                  | 101          | Similar prevalence of <i>P. falciparum</i> in HbAC and HbAA; lower parasite densities in HbAC                        |
| Motulsky et al (1966) <sup>22</sup>               | Democratic Republic of the Congo | Community survey         | 17-50y   | Slide-positive <i>P. falciparum</i> | 71                    | HbAS                  | 6            | Similar prevalence and density of <i>P. falciparum</i> in HbAS and HbAA                                              |
| Ringelhann et al (1976) <sup>23</sup>             | Ghana                            | Community survey         | <5y      | Slide-positive <i>P. falciparum</i> | NA                    | HbAS                  | NA           | Higher prevalence of <i>P. falciparum</i> in HbAS                                                                    |
|                                                   |                                  |                          |          |                                     |                       | HbAC                  | NA           | Similar prevalence of <i>P. falciparum</i> in HbAC and HbAA                                                          |
| Fleming et al (1979) <sup>24, a</sup>             | Nigeria                          | Community survey         | All ages | Slide-positive <i>P. falciparum</i> | 1925                  | HbAS                  | 766          | Similar prevalence of <i>P. falciparum</i> in HbAS and HbAA; lower parasite densities in HbAS                        |
| Storey et al (1979) <sup>25, a</sup>              | Nigeria                          | Community survey         | All ages | Slide-positive <i>P. falciparum</i> | 1925                  | HbAC                  | 21           | Similar prevalence and density of <i>P. falciparum</i> in HbAC and HbAA                                              |
| Bernstein et al (1980) <sup>26</sup>              | Cameroon                         | Community survey         | <6y      | Slide-positive <i>P. falciparum</i> | 951                   | HbAS                  | 205          | Similar prevalence of <i>P. falciparum</i> in HbAS and HbAA                                                          |
| Guggenmoos-Holzmann et al (1981) <sup>27, b</sup> | Nigeria                          | Febrile outpatients      | 9m-6y    | <i>P. falciparum</i> density        | 503                   | HbAS                  | 28           | Lower densities in HbAS than HbAA                                                                                    |
|                                                   |                                  |                          |          |                                     |                       | HbAC                  | 152          | Similar densities in HbAC and HbAA                                                                                   |
| Bienzle et al (1981) <sup>28, b</sup>             | Nigeria                          | Febrile outpatients      | 9m-6y    | Slide-positive <i>P. falciparum</i> | 503                   | HbAS                  | 28           | Similar prevalence of <i>P. falciparum</i> in HbAS and HbAA                                                          |
|                                                   |                                  |                          |          |                                     |                       | HbAC                  | 152          | Similar prevalence of <i>P. falciparum</i> in HbAC and HbAA                                                          |
| Willcox et al (1981) <sup>29</sup>                | Liberia                          | Outpatients              | >6m      | Slide-positive <i>P. falciparum</i> | 556                   | HbAS                  | 53           | Similar prevalence of <i>P. falciparum</i> in HbAS and HbAA                                                          |
|                                                   |                                  |                          |          |                                     |                       | $\beta$ -thalassaemia | 83           | Similar prevalence of <i>P. falciparum</i> in thalassaemics and normals                                              |
| Willcox et al (1983) <sup>30</sup>                | Liberia                          | Community survey         | Children | Slide-positive <i>P. falciparum</i> | 373                   | $\beta$ -thalassaemia | 159          | No difference in prevalence of parasitaemia; less gametocytes and lower parasite densities in $\beta$ -thalassaemics |
| Labie et al (1984) <sup>31</sup>                  | Burkina Faso                     | Community survey         | All ages | Slide-positive <i>P. falciparum</i> | 261                   | HbAS                  | 16           | Similar prevalence of <i>P. falciparum</i> in HbAS and HbAA                                                          |
|                                                   |                                  |                          |          |                                     |                       | HbAC                  | 76           | Similar prevalence of <i>P. falciparum</i> in HbAC and HbAA                                                          |

|                                        |                    |                                               |          |                                                        |      |                                     |     |                                                                                          |
|----------------------------------------|--------------------|-----------------------------------------------|----------|--------------------------------------------------------|------|-------------------------------------|-----|------------------------------------------------------------------------------------------|
| Allen et al (1992) <sup>32</sup>       | The Gambia         | Community survey                              | 3-8y     | Slide-positive <i>P. falciparum</i>                    | 309  | HbAS                                | 76  | Higher prevalence of <i>P. falciparum</i> in HbAS than HbAA                              |
| Kar et al (1992) <sup>33</sup>         | India              | Community survey                              | All ages | Slide-positive <i>P. falciparum</i> or <i>P. vivax</i> | 604  | HbEE                                | 12  | Lower prevalence of <i>P. vivax</i> and <i>P. falciparum</i> in HbEE than HbAA           |
|                                        |                    |                                               |          |                                                        |      | HbAE                                | 92  | Lower prevalence of <i>P. vivax</i> and <i>P. falciparum</i> in HbAE than HbAA           |
| Allen et al (1993) <sup>34</sup>       | The Gambia         | Community survey                              | 3-8y     | Slide-positive <i>P. falciparum</i>                    | 362  | Homozygous $\alpha$ -thalassaemia   | 7   | Similar prevalence of <i>P. falciparum</i> in thalassaemics and normals                  |
|                                        |                    |                                               |          |                                                        |      | Heterozygous $\alpha$ -thalassaemia | 102 | Similar prevalence of <i>P. falciparum</i> in thalassaemics and normals                  |
| Aluoch et al (1997) <sup>35</sup>      | Kenya              | Patients attending a blood testing laboratory | >6m      | Slide-positive <i>P. falciparum</i>                    | 592  | HbAS                                | 116 | Similar prevalence of <i>P. falciparum</i> in HbAS and HbAA                              |
| Ntoumi et al (1997) <sup>36</sup>      | Gabon              | School children                               | 7-14y    | Slide-positive <i>P. falciparum</i>                    | 123  | HbAS                                | 40  | <i>P. falciparum</i> less prevalent in HbAS individuals                                  |
| Mockenhaupt et al (1999) <sup>37</sup> | Nigeria            | Community survey                              | 6m-11y   | Slide-positive <i>P. falciparum</i>                    | 265  | Homozygous $\alpha$ -thalassaemia   | 43  | Similar prevalence of <i>P. falciparum</i> in thalassaemics and normals                  |
|                                        |                    |                                               |          |                                                        |      | Heterozygous $\alpha$ -thalassaemia | 186 | Similar prevalence of <i>P. falciparum</i> in thalassaemics and normals                  |
| Wambua et al (2006) <sup>38</sup>      | Kenya              | Community survey                              | <5y      | Slide-positive <i>P. falciparum</i>                    | 320  | Homozygous $\alpha$ -thalassaemia   | 171 | Similar prevalence of <i>P. falciparum</i> in thalassaemics and normals                  |
|                                        |                    |                                               |          |                                                        |      | Heterozygous $\alpha$ -thalassaemia | 543 | Similar prevalence of <i>P. falciparum</i> in thalassaemics and normals                  |
| Veenemans et al (2008) <sup>39</sup>   | Kenya and Tanzania | Community survey                              | 6m-8y    | Slide-positive <i>P. falciparum</i>                    | 317  | Homozygous $\alpha$ -thalassaemia   | 92  | Similar prevalence of <i>P. falciparum</i> in thalassaemics and normals                  |
|                                        |                    |                                               |          |                                                        |      | Heterozygous $\alpha$ -thalassaemia | 345 | Similar prevalence of <i>P. falciparum</i> in thalassaemics and normals                  |
| Fowkes et al (2008) <sup>40</sup>      | Papua New Guinea   | Community survey                              | 1-17y    | Slide-positive <i>P. falciparum</i>                    | 39   | Homozygous $\alpha$ -thalassaemia   | 311 | Similar prevalence of <i>P. falciparum</i> in thalassaemics and normals                  |
|                                        |                    |                                               |          |                                                        |      | Heterozygous $\alpha$ -thalassaemia | 205 | Similar prevalence of <i>P. falciparum</i> in thalassaemics and normals                  |
| Shekalaghe et al (2009) <sup>41</sup>  | Tanzania           | Community survey                              | All ages | Slide- or PCR-positive <i>P. falciparum</i>            | 295  | Homozygous $\alpha$ -thalassaemia   | 14  | Similar prevalence of <i>P. falciparum</i> in thalassaemics and normals                  |
|                                        |                    |                                               |          |                                                        |      | Heterozygous $\alpha$ -thalassaemia | 100 | Similar microscopy prevalence, higher PCR-prevalence in thalassaemics than normals       |
| Danquah et al (2010) <sup>42</sup>     | Ghana              | Community survey                              | 6m-9y    | Slide- or PCR-positive <i>P. falciparum</i>            | 1496 | HbAS                                | 157 | Similar prevalence of <i>P. falciparum</i> in HbAS and HbAA, but lower densities in HbAS |
|                                        |                    |                                               |          |                                                        |      | HbCC                                | 16  | Similar prevalence and density of <i>P. falciparum</i> in HbCC and HbAA                  |
|                                        |                    |                                               |          |                                                        |      | HbAC                                | 415 | Similar prevalence and density of <i>P. falciparum</i> in HbAC and HbAA                  |
| Jeremiah et al (2010) <sup>43</sup>    | Nigeria            | Community survey                              | 1-8y     | Slide-positive <i>P. falciparum</i>                    | 210  | HbAS                                | 30  | Similar prevalence of <i>P. falciparum</i> in HbAS and HbAA                              |

Abbreviations: NA, not available; Hb, hemoglobin

<sup>a</sup> Studies reported different outcomes for the same cohort.

<sup>b</sup> Studies reported different outcomes for the same cohort.



**Table S4. Cross-sectional studies of parasite prevalence in pregnancy and haemoglobinopathies**

| Source                                   | Location         | Timing    | n    | Variants                           | % primigravidae | Findings                                                                                                                                                               |
|------------------------------------------|------------------|-----------|------|------------------------------------|-----------------|------------------------------------------------------------------------------------------------------------------------------------------------------------------------|
| Hamilton et al (1972) <sup>44</sup>      | Uganda           | Antenatal | 1327 | HbAS                               | 31.2            | Higher prevalence of antenatal <i>P. falciparum</i> parasitaemia in HbAS (13.5%) v. HbAA (9.1%) women                                                                  |
| Fleming et al (1984) <sup>45</sup>       | Nigeria          | Antenatal | 228  | HbAS, HbAC                         | 100             | HbAS associated with non-significantly lower antenatal prevalence of <i>P. falciparum</i> compared with HbAA (17% v. 27%); no association with HbAC                    |
| Mockenhaupt et al (2000) <sup>46</sup>   | Ghana            | Antenatal | 530  | HbAS, HbAC, $\alpha$ -thalassaemia | 24.5            | No association between HbAS, HbAC, homozygous or heterozygous $\alpha$ -thalassaemia and antenatal <i>P. falciparum</i> parasitaemia                                   |
| Bouyou-Akotet et al (2003) <sup>47</sup> | Gabon            | Antenatal | 311  | HbAS                               | 69.8            | No association between HbAS and antenatal <i>P. falciparum</i> parasitaemia                                                                                            |
| O'Donnell et al (2006) <sup>48</sup>     | Papua New Guinea | Delivery  | 913  | $\alpha$ -thalassaemia             | 36.3            | No association between homozygous or heterozygous $\alpha$ -thalassaemia and placental malaria, peripheral parasitaemia at delivery, preterm delivery, or birth weight |

Abbreviation: Hb, hemoglobin.

### Supplementary references

1. Severe and complicated malaria. World Health Organization, Division of Control of Tropical Diseases. *Trans R Soc Trop Med Hyg.* 1990;84 Suppl 2:1-65.
2. Hill AV, Allsopp CE, Kwiatkowski D, et al. Common west African HLA antigens are associated with protection from severe malaria. *Nature.* Aug 15 1991;352(6336):595-600.
3. Agarwal A, Guindo A, Cissoko Y, et al. Hemoglobin C associated with protection from severe malaria in the Dogon of Mali, a West African population with a low prevalence of hemoglobin S. *Blood.* Oct 1 2000;96(7):2358-2363.
4. Modiano D, Luoni G, Sirima BS, et al. Haemoglobin C protects against clinical Plasmodium falciparum malaria. *Nature.* Nov 15 2001;414(6861):305-308.
5. Gilles HM, Fletcher KA, Hendrickse RG, Lindner R, Reddy S, Allan N. Glucose-6-phosphate-dehydrogenase deficiency, sickling, and malaria in African children in South Western Nigeria. *Lancet.* Jan 21 1967;1(7482):138-140.
6. Mockenhaupt FP, Ehrhardt S, Cramer JP, et al. Hemoglobin C and resistance to severe malaria in Ghanaian children. *J Infect Dis.* Sep 1 2004;190(5):1006-1009.
7. Ackerman H, Usen S, Jallow M, Sisay-Joof F, Pinder M, Kwiatkowski DP. A comparison of case-control and family-based association methods: the example of sickle-cell and malaria. *Ann Hum Genet.* Sep 2005;69(Pt 5):559-565.
8. May J, Evans JA, Timmann C, et al. Hemoglobin variants and disease manifestations in severe falciparum malaria. *JAMA.* May 23 2007;297(20):2220-2226.
9. Jallow M, Teo YY, Small KS, et al. Genome-wide and fine-resolution association analysis of malaria in West Africa. *Nat Genet.* Jun 2009;41(6):657-665.
10. Willcox M, Bjorkman A, Brohult J, Pehrson PO, Rombo L, Bengtsson E. A case-control study in northern Liberia of Plasmodium falciparum malaria in haemoglobin S and beta-thalassaemia traits. *Ann Trop Med Parasitol.* Jun 1983;77(3):239-246.
11. Guinet F, Diallo DA, Minta D, et al. A comparison of the incidence of severe malaria in Malian children with normal and C-trait hemoglobin profiles. *Acta Trop.* Nov 1997;68(2):175-182.
12. Oo M, Tin S, Marlar T, O'Sullivan WJ. Genetic red cell disorders and severity of falciparum malaria in Myanmar. *Bull World Health Organ.* 1995;73(5):659-665.
13. Hutagalung R, Wilairatana P, Looareesuwan S, Brittenham GM, Aikawa M, Gordeuk VR. Influence of hemoglobin E trait on the severity of Falciparum malaria. *J Infect Dis.* Jan 1999;179(1):283-286.
14. Lell B, May J, Schmidt-Ott RJ, et al. The role of red blood cell polymorphisms in resistance and susceptibility to malaria. *Clin Infect Dis.* Apr 1999;28(4):794-799.
15. Allen SJ, O'Donnell A, Alexander ND, et al. alpha+-Thalassemia protects children against disease caused by other infections as well as malaria. *Proc Natl Acad Sci U S A.* Dec 23 1997;94(26):14736-14741.
16. Mockenhaupt FP, Ehrhardt S, Gellert S, et al. Alpha(+)-thalassemia protects African children from severe malaria. *Blood.* Oct 1 2004;104(7):2003-2006.
17. Williams TN, Wambua S, Uyoga S, et al. Both heterozygous and homozygous alpha+ thalassemias protect against severe and fatal Plasmodium falciparum malaria on the coast of Kenya. *Blood.* Jul 1 2005;106(1):368-371.
18. Allison AC. Protection afforded by sickle-cell trait against subtertian malarial infection. *Br Med J.* Feb 6 1954;1(4857):290-294.
19. Colbourne MJ, Edington GM. Sickling and malaria in the Gold Coast. *Br Med J.* 1956;4970(1):784-786.

20. Edington GM, Laing WN. Relationship between haemoglobins C and S and malaria in Ghana. *Br Med J*. Jul 20 1957;2(5037):143-145.
21. Thompson GR. Significance of haemoglobins S and C in Ghana. *Br Med J*. Mar 10 1962;1(5279):682-685.
22. Motulsky AG, Vandepitte J, Fraser GR. Population genetic studies in the Congo. I. Glucose-6-phosphate dehydrogenase deficiency, hemoglobin S, and malaria. *Am J Hum Genet*. Nov 1966;18(6):514-537.
23. Ringelhann B, Hathorn MK, Jilly P, Grant F, Parniczky G. A new look at the protection of hemoglobin AS and AC genotypes against plasmodium falciparum infection: a census tract approach. *Am J Hum Genet*. May 1976;28(3):270-279.
24. Fleming AF, Storey J, Molineaux L, Iroko EA, Attai ED. Abnormal haemoglobins in the Sudan savanna of Nigeria. I. Prevalence of haemoglobins and relationships between sickle cell trait, malaria and survival. *Ann Trop Med Parasitol*. Apr 1979;73(2):161-172.
25. Storey J, Fleming AF, Cornille-Brogger R, Molineaux L, Matsushima T, Kagan I. Abnormal haemoglobins in the Sudan savanna of Nigeria. IV. Malaria, immunoglobulins and antimalarial antibodies in haemoglobin AC individuals. *Ann Trop Med Parasitol*. Aug 1979;73(4):311-315.
26. Bernstein SC, Bowman JE, Kaptue Noche L. Population studies in Cameroon: hemoglobin S, glucose-6-phosphate dehydrogenase deficiency and falciparum malaria. *Hum Hered*. 1980;30(4):251-258.
27. Guggenmoos-Holzmann I, Bienzle U, Luzzatto L. Plasmodium falciparum malaria and human red cells. II. Red cell genetic traits and resistance against malaria. *Int J Epidemiol*. 1981;10(1):16-22.
28. Bienzle U, Guggenmoos-Holzmann I, Luzzatto L. Plasmodium falciparum malaria and human red cells. I. A genetic and clinical study in children. *Int J Epidemiol*. 1981;10(1):9-15.
29. Willcox MC, Beckman L. Haemoglobin variants, beta-thalassaemia and G-6-PD types in Liberia. *Hum Hered*. 1981;31(6):339-347.
30. Willcox M, Bjorkman A, Brohult J. Falciparum malaria and beta-thalassaemia trait in northern Liberia. *Ann Trop Med Parasitol*. Aug 1983;77(4):335-347.
31. Labie D, Richin C, Pagnier J, Gentilini M, Nagel RL. Hemoglobins S and C in Upper Volta. *Hum Genet*. 1984;65(3):300-302.
32. Allen SJ, Bennett S, Riley EM, et al. Morbidity from malaria and immune responses to defined Plasmodium falciparum antigens in children with sickle cell trait in The Gambia. *Trans R Soc Trop Med Hyg*. Sep-Oct 1992;86(5):494-498.
33. Kar S, Seth S, Seth PK. Prevalence of malaria in Ao Nagas and its association with G6PD and HbE. *Hum Biol*. Apr 1992;64(2):187-197.
34. Allen SJ, Rowe P, Allsopp CE, et al. A prospective study of the influence of alpha thalassaemia on morbidity from malaria and immune responses to defined Plasmodium falciparum antigens in Gambian children. *Trans R Soc Trop Med Hyg*. May-Jun 1993;87(3):282-285.
35. Aluoch JR. Higher resistance to Plasmodium falciparum infection in patients with homozygous sickle cell disease in western Kenya. *Trop Med Int Health*. Jun 1997;2(6):568-571.
36. Ntoumi F, Mercereau-Puijalon O, Ossari S, et al. Plasmodium falciparum: sickle-cell trait is associated with higher prevalence of multiple infections in Gabonese children with asymptomatic infections. *Exp Parasitol*. Sep 1997;87(1):39-46.
37. Mockenhaupt FP, Falusi AG, May J, et al. The contribution of alpha+-thalassaemia to anaemia in a Nigerian population exposed to intense malaria transmission. *Trop Med Int Health*. Apr 1999;4(4):302-307.

38. Wambua S, Mwangi TW, Kortok M, et al. The effect of alpha+-thalassaemia on the incidence of malaria and other diseases in children living on the coast of Kenya. *PLoS Med.* May 2006;3(5):e158.
39. Veenemans J, Andang'o PE, Mbugi EV, et al. Alpha+ -thalassemia protects against anemia associated with asymptomatic malaria: evidence from community-based surveys in Tanzania and Kenya. *J Infect Dis.* Aug 1 2008;198(3):401-408.
40. Fowkes FJ, Michon P, Pilling L, et al. Host erythrocyte polymorphisms and exposure to *Plasmodium falciparum* in Papua New Guinea. *Malar J.* 2008;7:1.
41. Shekalaghe S, Alifrangis M, Mwanziva C, et al. Low density parasitaemia, red blood cell polymorphisms and *Plasmodium falciparum* specific immune responses in a low endemic area in northern Tanzania. *BMC Infect Dis.* 2009;9:69.
42. Danquah I, Ziniel P, Eggelte TA, Ehrhardt S, Mockenhaupt FP. Influence of haemoglobins S and C on predominantly asymptomatic *Plasmodium* infections in northern Ghana. *Trans R Soc Trop Med Hyg.* Nov 2010;104(11):713-719.
43. Jeremiah ZA, Jeremiah TA, Emelike FO. Frequencies of some human genetic markers and their association with *Plasmodium falciparum* malaria in the Niger Delta, Nigeria. *J Vector Borne Dis.* Mar 2010;47(1):11-16.
44. Hamilton PJ, Gebbie DA, Wilks NE, Lothe F. The role of malaria, folic acid deficiency and haemoglobin AS in pregnancy at Mulago hospital. *Trans R Soc Trop Med Hyg.* 1972;66(4):594-602.
45. Fleming AF, Harrison KA, Briggs ND, et al. Anaemia in young primigravidae in the guinea savanna of Nigeria: sickle-cell trait gives partial protection against malaria. *Ann Trop Med Parasitol.* Aug 1984;78(4):395-404.
46. Mockenhaupt FP, Rong B, Gunther M, et al. Anaemia in pregnant Ghanaian women: importance of malaria, iron deficiency, and haemoglobinopathies. *Trans R Soc Trop Med Hyg.* Sep-Oct 2000;94(5):477-483.
47. Bouyou-Akotet MK, Ionete-Collard DE, Mabika-Manfoumbi M, et al. Prevalence of *Plasmodium falciparum* infection in pregnant women in Gabon. *Malar J.* Jun 25 2003;2:18.
48. O'Donnell A, Raiko A, Clegg JB, Weatherall DJ, Allen SJ. Alpha+ -thalassaemia and pregnancy in a malaria endemic region of Papua New Guinea. *Br J Haematol.* Oct 2006;135(2):235-241.
